# Supplementary material for: A bi-functional air electrode developed from a dual-MOF strategy for high-performance zinc–air batteries
Source: Royal Society of Chemistry journal article supplement (doi:10.1039/d4ey00008k), 2024-01-01
Supplement: d4ey00008k1.pdf [file d4ey00008k1.pdf]

## Bi-functional air electrode developed from dual-MOFs strategy for high-performance zinc-air batteries

Yasir Arafat <sup>a</sup>, Muhammad Rizwan Azhar <sup>b</sup>, Yijun Zhong <sup>a</sup>, Xiaomin Xu <sup>a</sup>, Moses O Tadé <sup>a</sup> and Zongping Shao <sup>\*a</sup>

a. WA School of Mines: Minerals, Energy and Chemical Engineering (WASM-MECE), Curtin University, Perth, WA 6102, Australia.

b. School of Engineering, Edith Cowan University, 270 Joondalup Drive, Joondalup, WA 6027, Australia.

\*Corresponding author

### Supplementary information

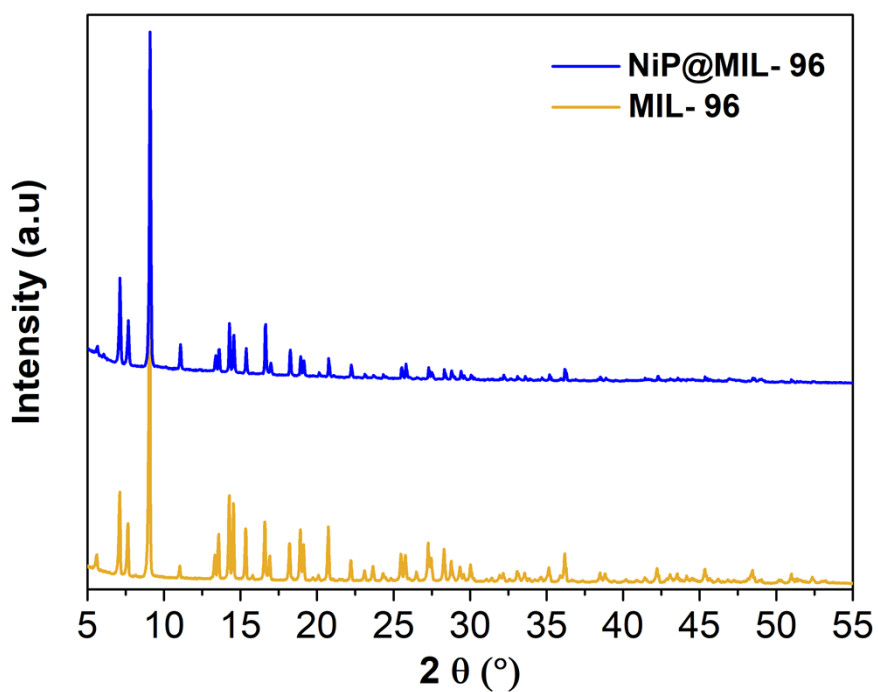

Fig.S1 XRD patterns of (a) MIL-96 and NiP-plated MIL-96

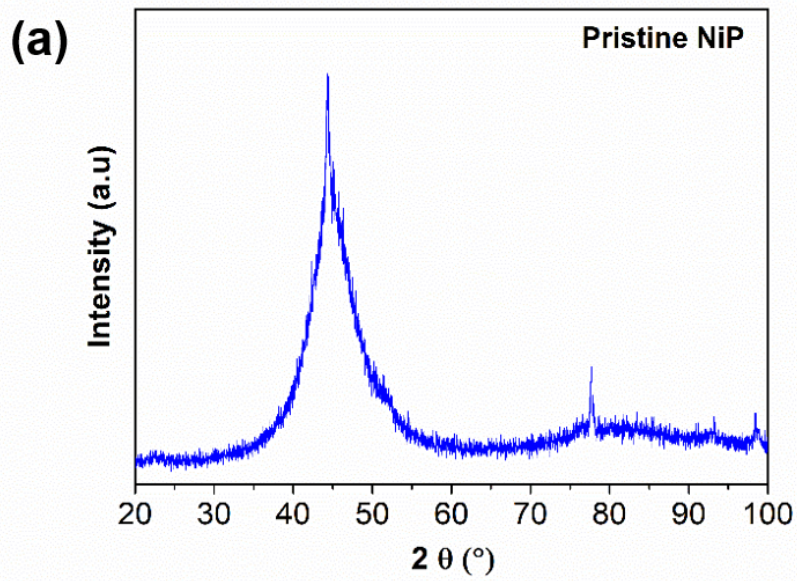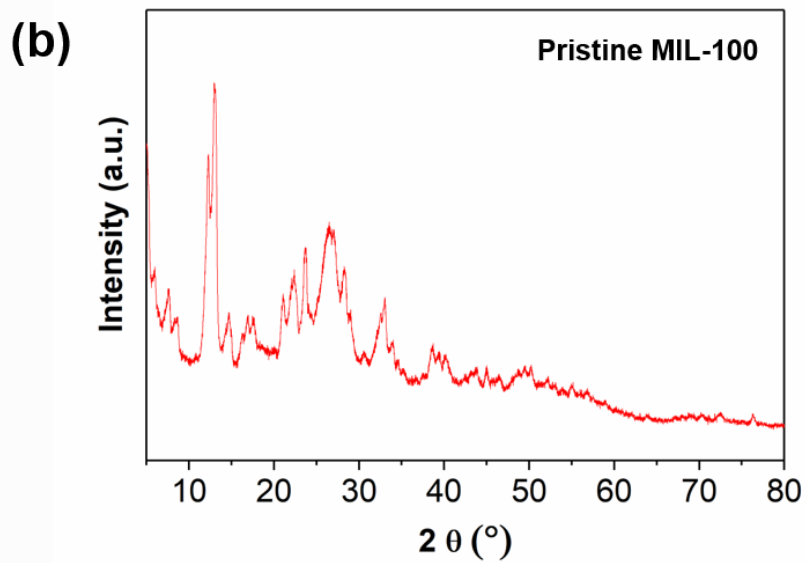

Fig. S2 XRD patterns of (a) pristine NiP-plating (b) pristine MIL-100

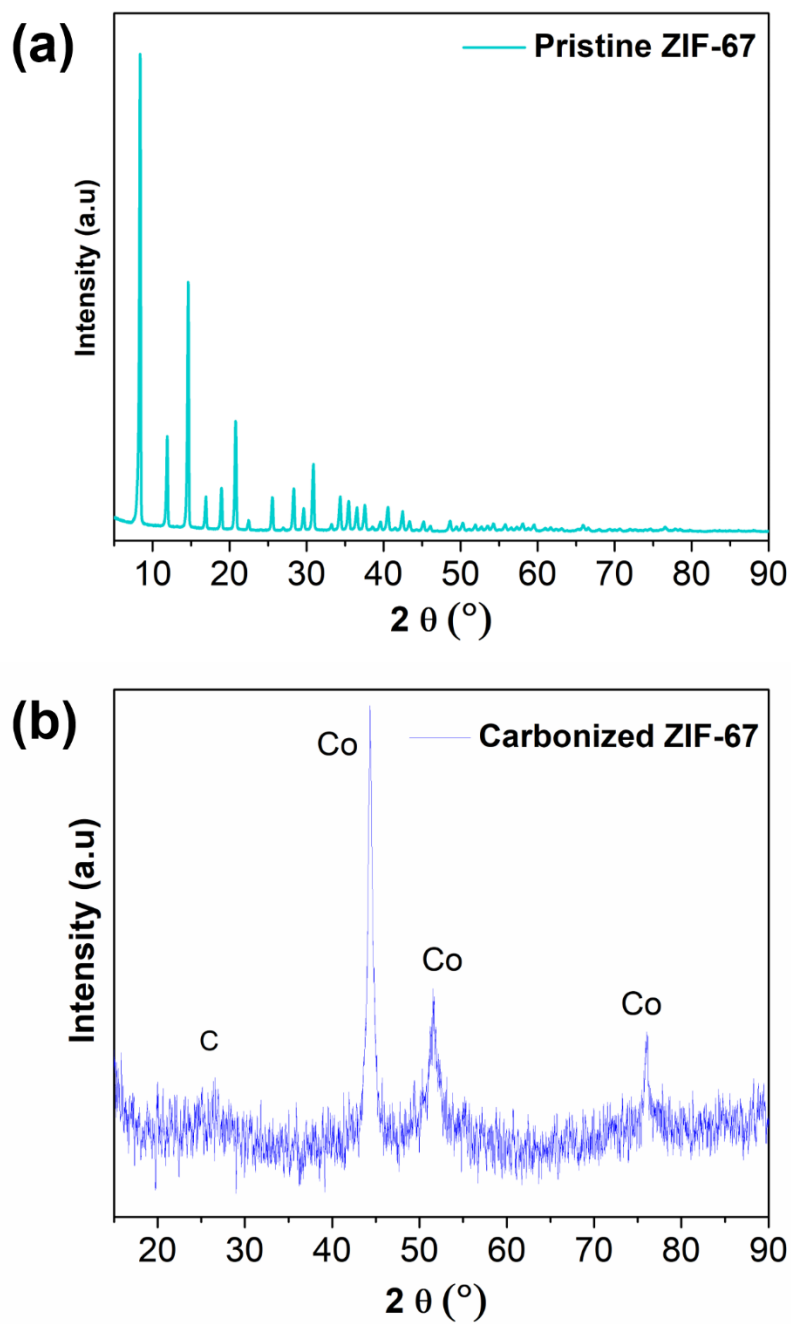

Fig.S3 XRD patterns of pristine ZIF-67 and (b) Carbonized ZIF-67 after the calcination of ZIF-67 at 750°C in the atmosphere of  $N_2$ .

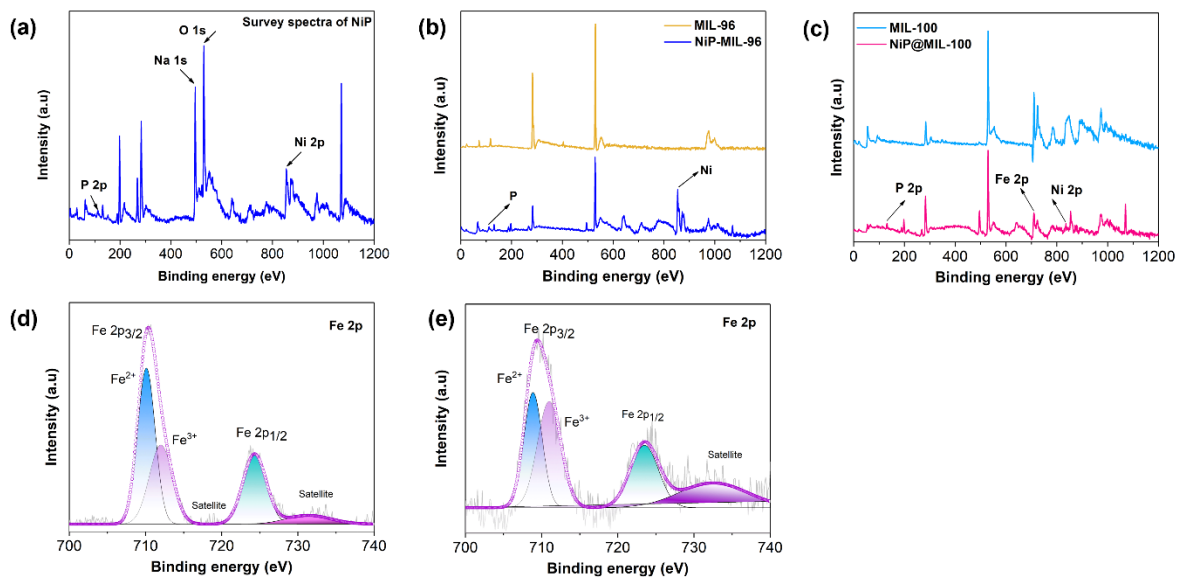

**Fig. S4** Survey spectra of (a) pristine NiP, (b) pristine MIL-96 and NiP@MIL-96 and (c) pristine MIL-100 and NiP@MIL-100, High-resolution deconvoluted XPS spectrum of Fe 2p of (d) pristine MIL-100 and (e) NiP@MIL-100

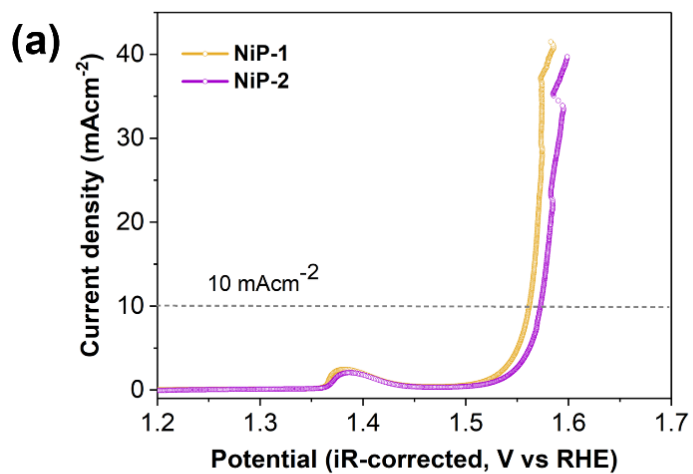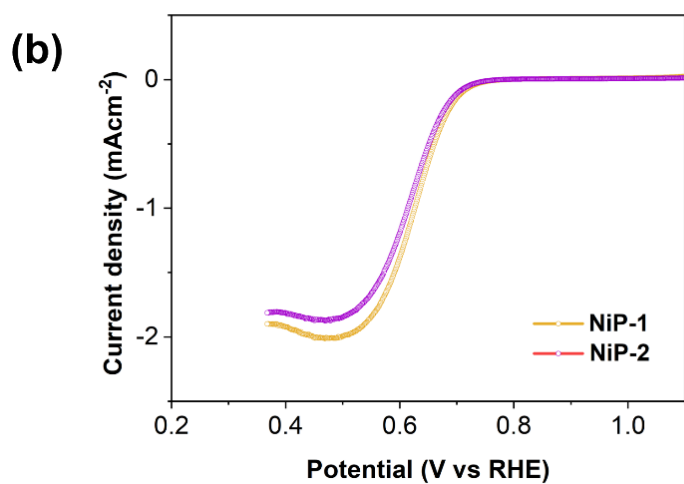

Fig. S5 (a) iR-corrected LSV curves of OER of NiP1 and NiP2 (b) LSV curves of ORR of NiP1 and NiP2

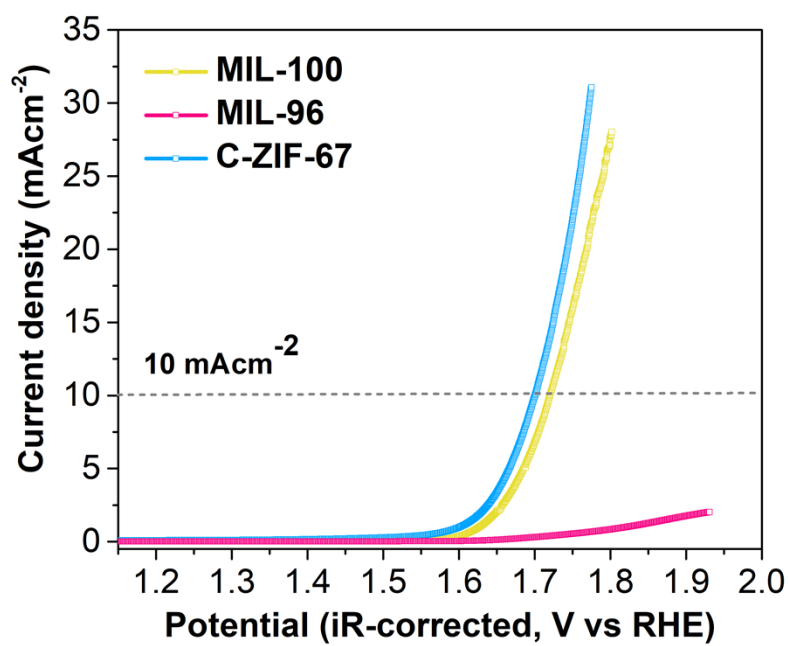

Fig. S6 iR-corrected LSV curves of OER of pristine MIL-96, MIL-100 and carbonized ZIF-67

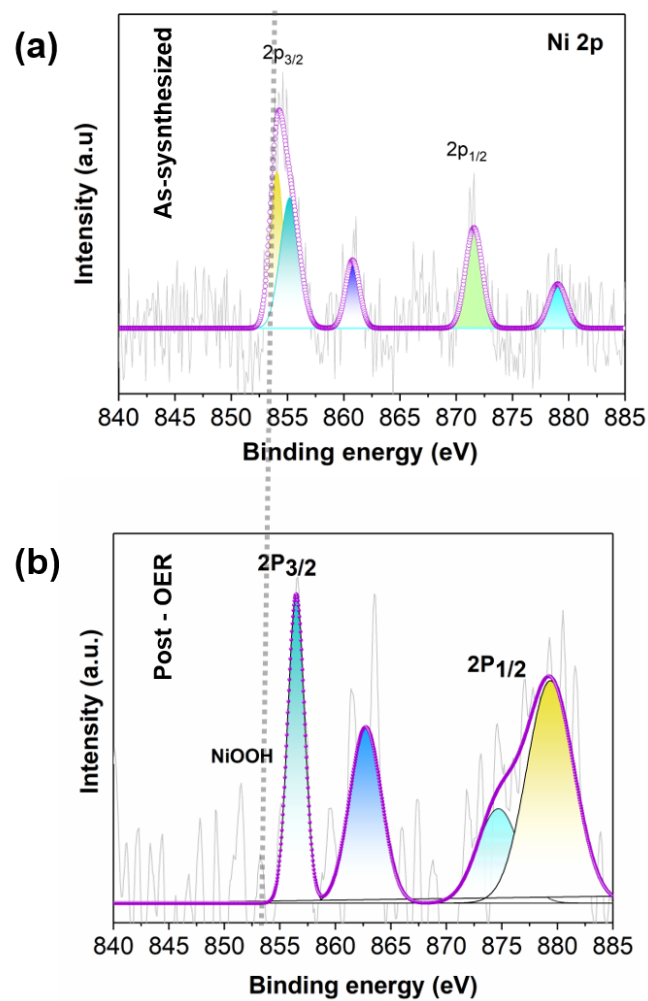

Figure S7. XPS characterization of Ni 2p in the NiP@MIL-100 (a) XPS spectra of the as-synthesized NiP@MIL-100, (b) XPS spectra of NiP@MIL-100 after OER activity, respectively.

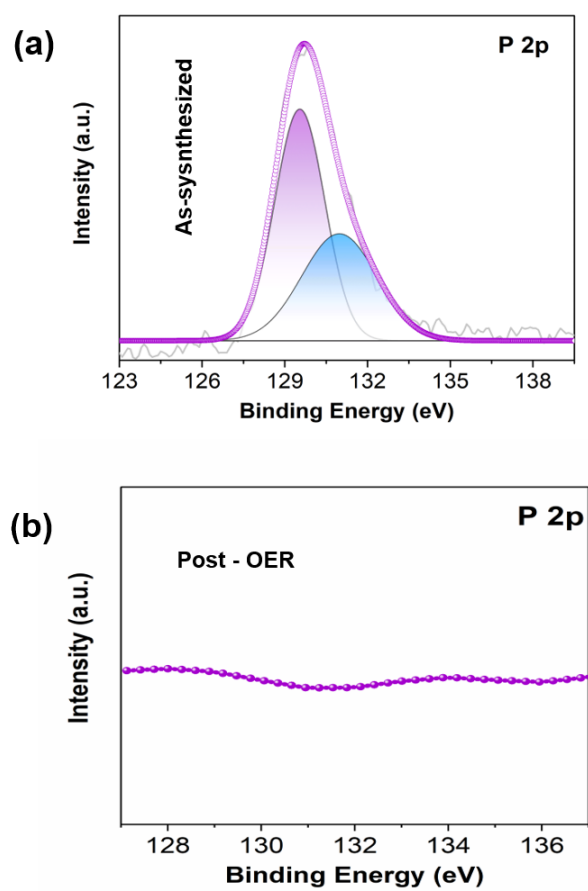

Figure S8. XPS characterization of P 2p in the NiP@MIL-100 (a) XPS spectra of the as-synthesized NiP@MIL-100, (b) XPS spectra of NiP@MIL-100 after OER activity, respectively.



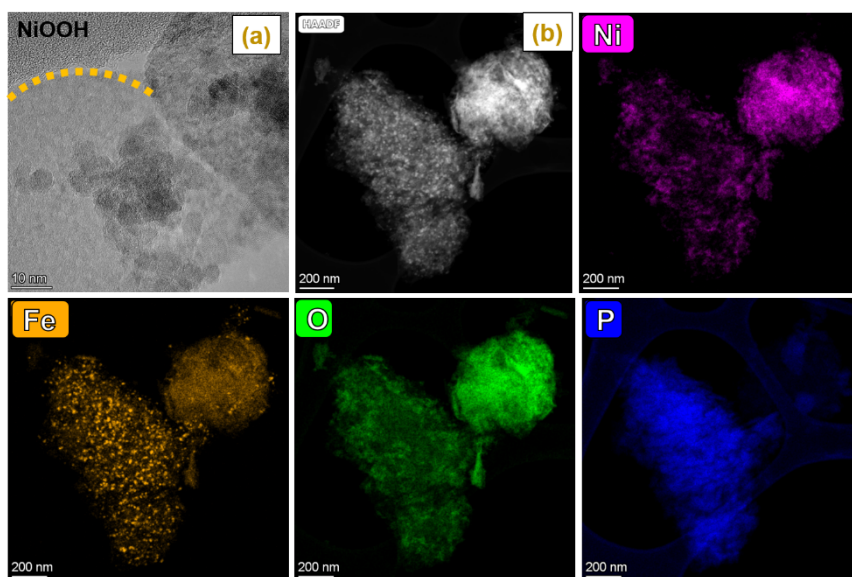

**Fig. S9** TEM and HAADF-STEM images of spent NiP@MIL-100 sample after OER and its corresponding element mapping images.

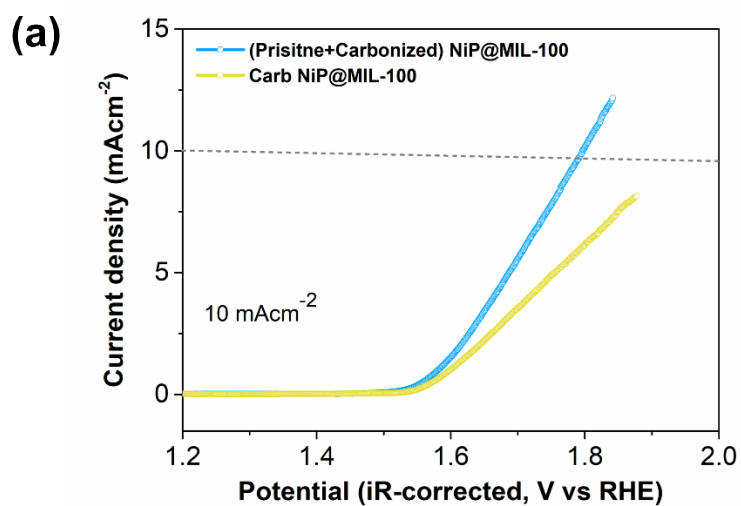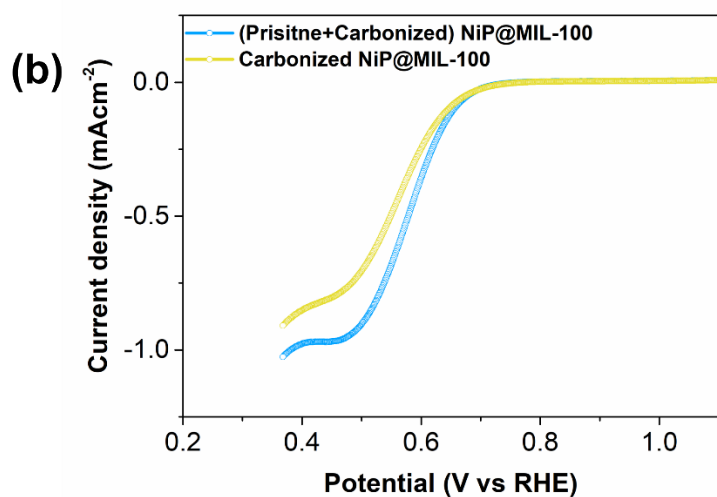

Fig. S10 (a) iR-corrected LSV curves of OER of carbonized NiP@MIL-100 and pristine +carbonized (50:50) NiP@MIL-100 catalysts in  $\text{O}_2$ -saturated 0.10 M KOH solution at 1600 rpm; (b) LSV curves of ORR of carbonized NiP@MIL-100 and pristine +carbonized (50:50) NiP@MIL-100 catalysts in  $\text{O}_2$ -saturated 0.10 M KOH solution at 1600 rpm

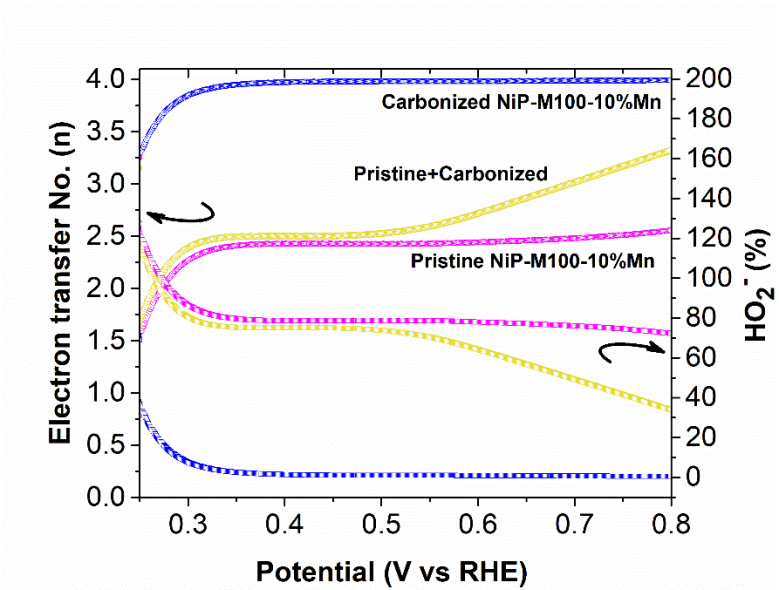

Fig. S11 Electron transfer number and percentage of HO<sub>2</sub><sup>-</sup> of pristine NiP@MIL-100, carbonized NiP@MIL-100 and pristine +carbonized (50:50) NiP@MIL-100 catalysts.

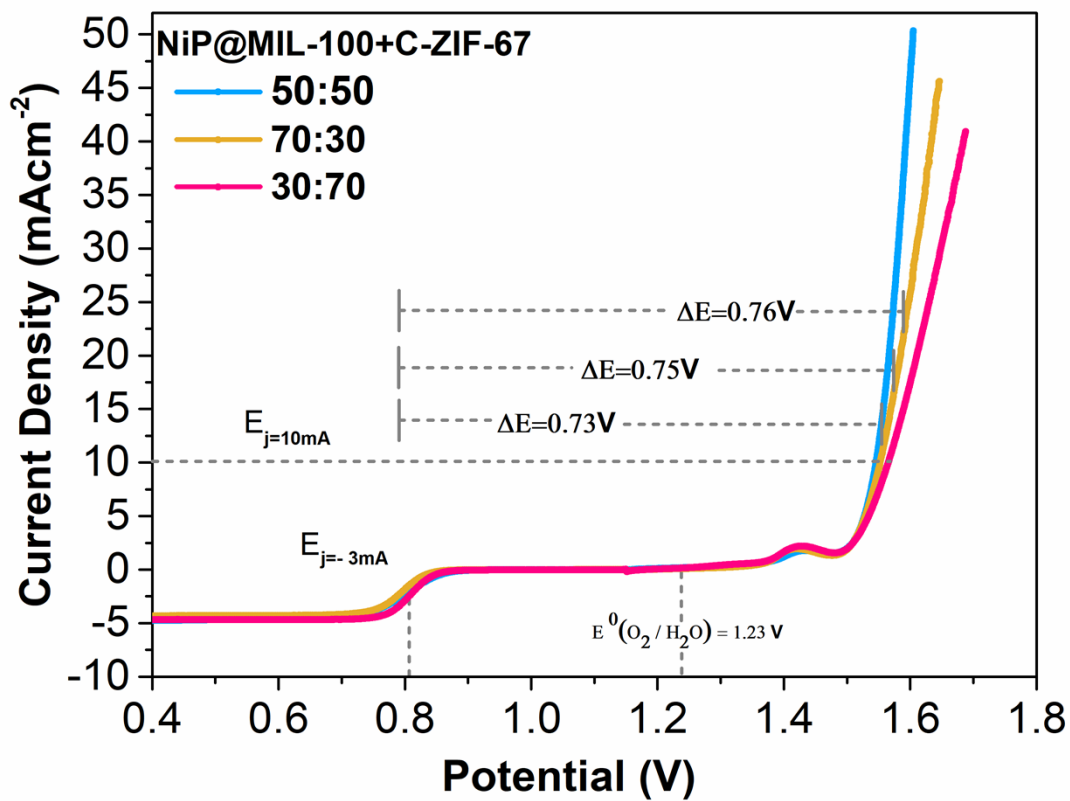

Fig. S12 Overall polarization curves of C-ZIF-67+NiP@MIL-100 at different ratios in 0.1 M KOH

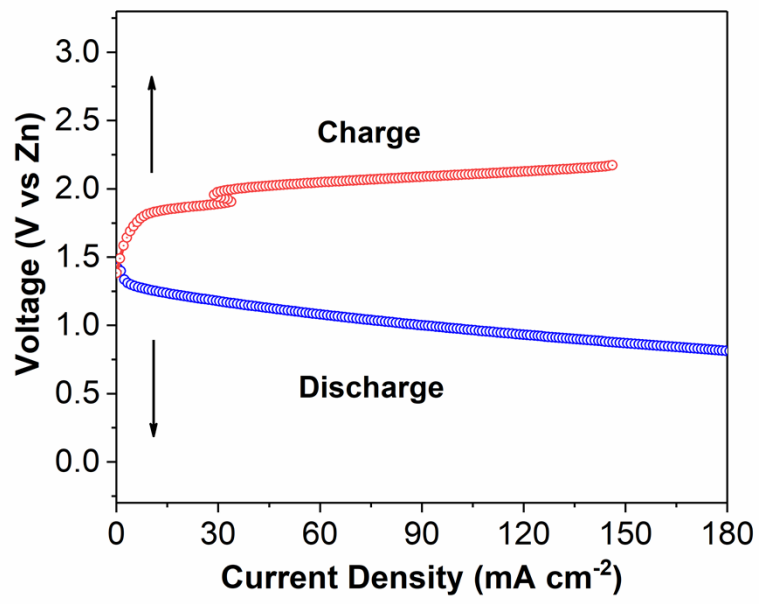

Fig. S13 Discharge and charge polarization curves

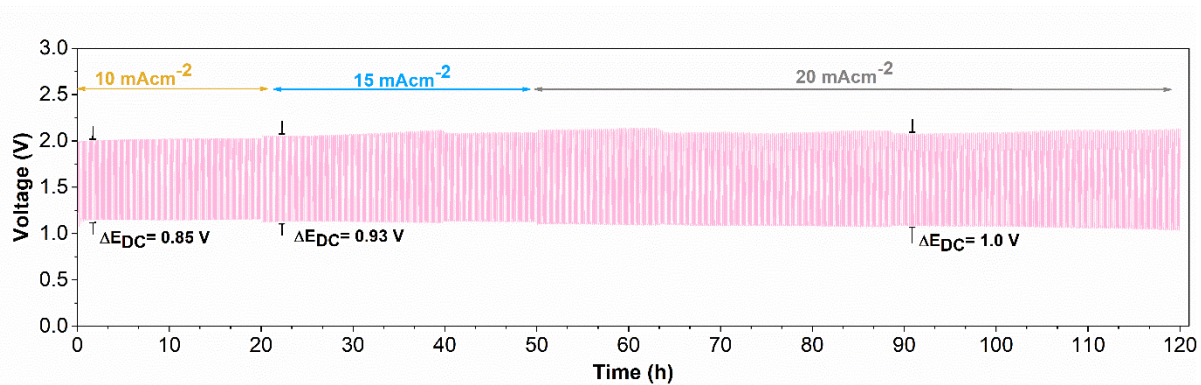

Fig. S14 Galvanostatic charge/discharge test for rechargeable zinc-air battery based on pristine NiP@MIL-100+ carbonized ZIF-67 tested for cyclic stability at 10, 15 and 20 mA cm<sup>-2</sup>

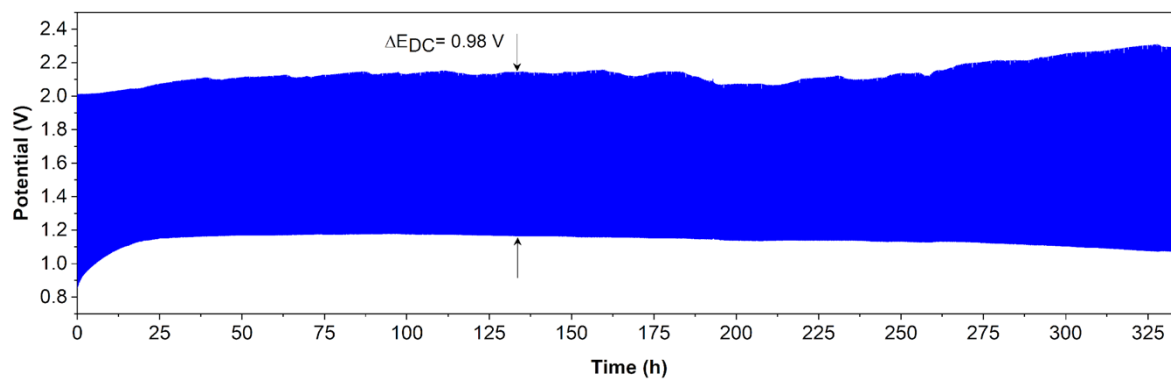

Fig. S15 Rechargeable zinc–air battery test. galvanostatic charge/discharge test based on pristine NiP@MIL-100 catalysts tested for cyclic stability at  $5 \text{ mA cm}^{-2}$ .

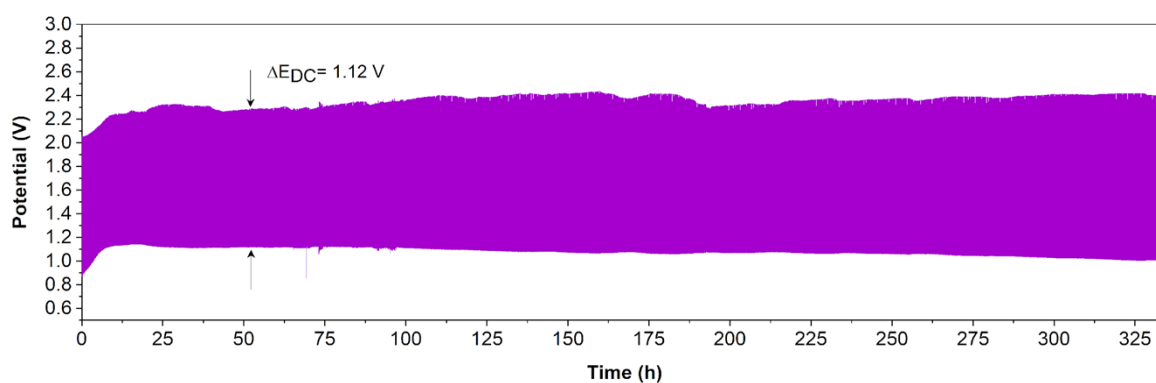

Fig. S16 Rechargeable zinc–air battery test. galvanostatic charge/discharge test based on carbonized NiP@MIL-100 catalysts tested for cyclic stability at  $5 \text{ mA cm}^{-2}$ .

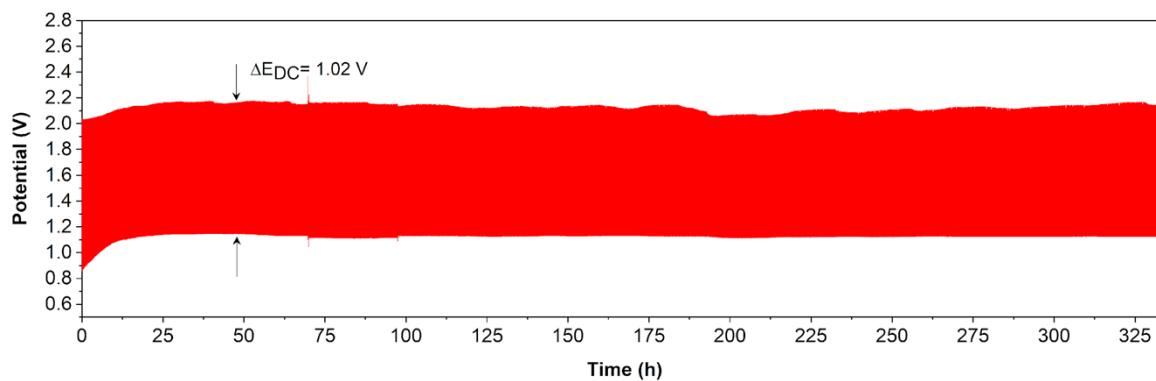

Fig. S17 Rechargeable zinc–air battery test. galvanostatic charge/discharge test based on pristine+carbonized (50:50) NiP@MIL-100 catalysts tested for cyclic stability at  $5 \text{ mA cm}^{-2}$ .

**Table S1 BET surface area, pore volume and pore size of different materials.**

| <b>Catalyst</b> | <b>Surface area<br/>(m<sup>2</sup>/g)</b> | <b>Pore volume<br/>(cm<sup>3</sup>/g)</b> | <b>Pore size<br/>(nm)</b> |
|-----------------|-------------------------------------------|-------------------------------------------|---------------------------|
| MIL-96          | 619.5                                     | 0.2180                                    | 1.74                      |
| NiP@MIL-96      | 11.2                                      | 0.0054                                    | 0.27                      |
| MIL-100         | 1,594.7                                   | 0.3676                                    | 1.77                      |
| NiP@MIL-100     | 6.1                                       | 0.0005                                    | 0.98                      |



**Table. S2 Peak positions of the samples before and after NiP-plating**

| Samples      | Peak position of elements (eV) |             |                 |            |                  |
|--------------|--------------------------------|-------------|-----------------|------------|------------------|
|              | Ni                             |             | P               |            | Fe               |
|              | Ni <sup>δ+</sup>               | Oxidized Ni | P <sup>δ-</sup> | Oxidized P | Fe <sup>2+</sup> |
| Pristine NiP | 853.82                         | 855.15      | 130.5           | 132.4      | -                |
| NiP@MIL-96   | 853.80                         | 855.14      | 130.5           | 132.35     | -                |
| MIL-100      |                                | -           |                 | -          | 710.1            |
| NiP@MIL-100  | 854.75                         | 855.3       | 129.6           | 131.2      | 708.6            |

**Table S3 Performance comparison of OER, ORR and Zinc-air battery performance of recently published work.**

| <b>Catalysts</b>                                           | <b>Peak power density<br/>(mW cm<sup>-2</sup>)</b> | <b>Onset Potential<br/>V</b> | <b>E<sub>1/2</sub><br/>V</b> | <b>E<sub>j=10</sub><br/>V</b> | <b>ΔE= E<sub>j=10</sub>-E<sub>1/2</sub><br/>V</b> | <b>Tafel slope<br/>mvdec<sup>-1</sup></b> | <b>Stability<br/>(h)</b> | <b>References</b> |
|------------------------------------------------------------|----------------------------------------------------|------------------------------|------------------------------|-------------------------------|---------------------------------------------------|-------------------------------------------|--------------------------|-------------------|
| NiP@MIL-100+C-ZIF-67                                       | 203                                                | 0.94                         | 0.83                         | 1.52                          | 0.69                                              | 62                                        | 500                      | This study        |
| 109CoNC SAC                                                | 162                                                | 1.05                         | 0.86                         | 1.65                          | 0.79                                              | -                                         | 80                       | 1                 |
| NCA/Fe <sub>SA+NC</sub>                                    | 236                                                | 1.12                         | 0.92                         | 1.57                          | 0.65                                              | 71.5                                      | 300                      | 2                 |
| Fe <sub>1.2</sub> (CoNi) <sub>1.8</sub> S <sub>6</sub> MES | 124                                                | -                            | 0.80                         | 1.48                          | 0.68                                              | 53.0                                      | 140                      | 3                 |
| Fe, Ni@N-MWCNTs                                            | 114.9                                              | 0.84                         | 0.71                         | 1.54                          | 0.83                                              | 40.0                                      | 170                      | 4                 |
| Pt-NiO@Ni SP                                               | 188                                                | 1.04                         | 0.90                         | 1.55                          | 0.65                                              | 97.3                                      | 200                      | 5                 |
| CoP/CoO@MNC-CNT                                            | 152.8                                              | 0.921                        | 0.84                         | 1.50                          | 0.66                                              | 89.3                                      | 500                      | 6                 |
| Cu-Co/NC                                                   | 295.9                                              | 0.97                         | 0.85                         | 1.49                          | 0.64                                              | 60.4                                      | 500                      | 7                 |
| Co-CoO/NPCF                                                | 214.1                                              | 0.91                         | 0.843                        | 1.59                          | 0.75                                              | 43.8                                      | 200                      | 8                 |
| CrMnFeCoNi                                                 | 116.5                                              | 0.88                         | 0.78                         | 1.50                          | 0.72                                              | 38                                        | 240                      | 9                 |
| Co@C-CoNC                                                  | 162.8                                              | 0.99                         | 0.906                        | 1.64                          | 0.74                                              | 73                                        | 100                      | 10                |
| Fe SAs HS                                                  | 170                                                | 1.0                          | 0.86                         | 1.57                          | 0.71                                              | 68.8                                      | 70                       | 11                |
| NixP-NP-C900                                               | 266                                                | 0.90                         | 0.76                         | 1.78                          | 1.02                                              | 205                                       | 20                       | 12                |
| S-CFZ                                                      | 180                                                | 0.84                         | 0.82                         | 1.53                          | 0.71                                              | -                                         | 500                      | 13                |
| Co1-N3PS/HC                                                | 176                                                | 1.0                          | 0.92                         | -                             | -                                                 | -                                         | 50                       | 14                |
| SA&NP-FeCo-NTS                                             | 108                                                | 0.98                         | 0.85                         | 1.58                          | 0.73                                              | 109                                       | 250                      | 15                |

|                               |       |      |      |      |      |     |     |    |
|-------------------------------|-------|------|------|------|------|-----|-----|----|
| CoFeN-NCNTs//CCM              | 145   | 0.89 | 0.84 | 1.57 | 0.73 | 49  | 500 | 16 |
| NiFe <sub>3</sub> @NGHS-NCNTs | 126.5 | -    | 0.83 | 1.62 | 0.79 | -   | 166 | 17 |
| Co/CoSe@NC                    | 148   | 0.9  | 0.81 | 1.56 | 0.75 | 78  | 125 | 18 |
| Co/CeO <sub>2</sub> -NCNA@CC  | 123   | -    | 0.77 | 1.58 | 0.81 | -   | 380 | 19 |
| FeNP@Fe-N-C                   | 106.5 | 0.92 | 0.84 | 1.55 | 0.71 | 216 | 68  | 20 |
| CC3                           | 85    | 0.97 | 0.83 | 1.62 | 0.79 | 102 | 120 | 21 |
| S-NiFe-LDH/NG                 | 165   | 0.85 | 0.70 | 1.47 | 0.77 | 41  | 120 | 22 |
| Ni-Fe-S/xNCQDs                | 94    | 0.97 | 0.85 | 1.53 | 0.68 | 86  | 240 | 23 |
| Fe-FNC                        | 226   | 0.85 | 0.80 | -    | -    | -   | 140 | 24 |
| Fe/12Zn/Co-NCNTs              | 166   | 1.0  | 0.88 | 1.57 | 0.69 | 93  | 320 | 25 |
| Fe <sub>3</sub> Co/DSA-NSC    | 240   | 0.96 | 0.88 | 1.45 | 0.57 | 62  | 60  | 26 |
| Fe <sub>3</sub> C/N,S-CNS     | 163   | 0.98 | 0.86 | -    | -    | 77  | 750 | 27 |
| FeNi <sub>3</sub> @NWC        | 143   | -    | 0.84 | 1.52 | 0.68 | -   | 266 | 28 |
| Co@NSC                        | 141   | 0.91 | 0.86 | 1.57 | 0.71 | 181 | 94  | 29 |
| FeNi LDH-TpF6                 | 118   | -    | -    | -    | -    | -   | 800 | 30 |
| CoCu/N-CNS                    | 104.3 | 0.92 | 0.84 | 1.48 | 0.64 | 99  | 400 | 31 |
| NPPC                          | 173.8 | 0.97 | 0.87 | -    | -    | -   | 300 | 32 |
| FeCoP2-CN <sub>C</sub>        | 76.9  | 0.91 | 0.85 | 1.53 | 0.68 | 124 | 45  | 33 |

## References

1. C.-X. Zhao, J.-N. Liu, J. Wang, C. Wang, X. Guo, X.-Y. Li, X. Chen, L. Song, B.-Q. Li and Q. Zhang, *Science Advances*, 2022, **8**, eabn5091.
2. Y. Chen, T. He, Q. Liu, Y. Hu, H. Gu, L. Deng, H. Liu, Y. Liu, Y.-N. Liu, Y. Zhang, S. Chen and X. Ouyang, *Applied Catalysis B: Environmental*, 2023, **323**, 122163.
3. H. Wu, Z. Li, Z. Wang, Y. Ma, S. Huang, F. Ding, F. Li, Q. Zhai, Y. Ren, X. Zheng, Y. Yang, S. Tang, Y. Deng and X. Meng, *Applied Catalysis B: Environmental*, 2023, **325**, 122356.
4. Q. Jing, Z. Mei, X. Sheng, X. Zou, Y. Yang, C. Zhang, L. Wang, Y. Sun, L. Duan and H. Guo, *Chemical Engineering Journal*, 2023, **462**, 142321.
5. F. Zhang, R. Ji, X. Zhu, H. Li, Y. Wang, J. Wang, F. Wang and H. Lan, *Small*, **n/a**, 2301640.
6. H. W. Go, T. T. Nguyen, Q. P. Ngo, R. Chu, N. H. Kim and J. H. Lee, *Small*, 2023, **19**, 2206341.
7. Z. Li, S. Ji, C. Wang, H. Liu, L. Leng, L. Du, J. Gao, M. Qiao, J. H. Horton and Y. Wang, *Advanced Materials*, 2023, **35**, 2300905.
8. Y. Luo, M. Wen, J. Zhou, Q. Wu, G. Wei and Y. Fu, *Small*, **n/a**, 2302925.
9. R. He, L. Yang, Y. Zhang, X. Wang, S. Lee, T. Zhang, L. Li, Z. Liang, J. Chen, J. Li, A. Ostovari Moghaddam, J. Llorca, M. Ibáñez, J. Arbiol, Y. Xu and A. Cabot, *Energy Storage Materials*, 2023, **58**, 287-298.
10. S. Chandrasekaran, R. Hu, L. Yao, L. Sui, Y. Liu, A. Abdelkader, Y. Li, X. Ren and L. Deng, *Nano-Micro Letters*, 2023, **15**, 48.
11. Y. Wang, P. Meng, Z. Yang, M. Jiang, J. Yang, H. Li, J. Zhang, B. Sun and C. Fu, *Angewandte Chemie International Edition*, 2023, **62**, e202304229.
12. Y. Wang, J. Liu, T. Lu, R. He, N. Xu and J. Qiao, *Applied Catalysis B: Environmental*, 2023, **321**, 122041.
13. Y. Jiang, Y.-P. Deng, R. Liang, N. Chen, G. King, A. Yu and Z. Chen, *Journal of the American Chemical Society*, 2022, **144**, 4783-4791.
14. Y. Chen, R. Gao, S. Ji, H. Li, K. Tang, P. Jiang, H. Hu, Z. Zhang, H. Hao and Q. Qu, *Angew. Chem. Int. Ed.*, 2021, **60**, 3212-3221.
15. Q. Zhang, P. Liu, X. Fu, Y. Yuan, L. Wang, R. Gao, L. Zheng, L. Yang and Z. Bai, *Adv. Funct. Mater.*, 2022, **32**, 2112805.
16. G. Zhou, G. Liu, X. Liu, Q. Yu, H. Mao, Z. Xiao and L. Wang, *Adv. Funct. Mater.*, 2022, **32**, 2107608.
17. Y. Ma, W. Chen, Z. Jiang, X. Tian, X. WangGuo, G. Chen and Z.-J. Jiang, *J. Mater. Chem. A*, 2022, **10**, 12616-12631.
18. K. Li, R. Cheng, Q. Xue, P. Meng, T. Zhao, M. Jiang, M. Guo, H. Li and C. Fu, *Chem. Eng. J.*, 2022, **450**, 137991.
19. S. Li, H. Zhang, L. Wu, H. Zhao, L. Li, C. Sun and B. An, *J. Mater. Chem. A*, 2022, **10**, 9858-9868.
20. C. Yang, S. Shang, Q. Gu, J. Shang and X.-y. Li, *J. Energy Chem.*, 2022, **66**, 306-313.
21. C. Liu, F. Liu, H. Li, J. Chen, J. Fei, Z. Yu, Z. Yuan, C. Wang, H. Zheng, Z. Liu, M. Xu, G. Henkelman, L. Wei and Y. Chen, *ACS Nano*, 2021, **15**, 3309-3319.
22. X. Han, N. Li, J. S. Baik, P. Xiong, Y. Kang, Q. Dou, Q. Liu, J. Y. Lee, C. S. Kim and H. S. Park, *Advanced Functional Materials*, 2023, **33**, 2212233.
23. R. Wang, J. Liu, J. Xie, Z. Cai, Y. Yu, Z. Zhang, X. Meng, C. Wang, X. Xu and J. Zou, *Applied Catalysis B: Environmental*, 2023, **324**, 122230.
24. C. Xu, C. Guo, J. Liu, B. Hu, H. Chen, G. Li, X. Xu, C. Shu, H. Li and C. Chen, *Small*, **n/a**, 2207675.
25. J. Xue, S. Deng, R. Wang and Y. Li, *Carbon*, 2023, **205**, 422-434.
26. G. Yasin, S. Ali, S. Ibraheem, A. Kumar, M. Tabish, M. A. Mushtaq, S. Ajmal, M. Arif, M. A. Khan, A. Saad, L. Qiao and W. Zhao, *ACS Catalysis*, 2023, **13**, 2313-2325.
27. Q.-D. Ruan, R. Feng, J.-J. Feng, Y.-J. Gao, L. Zhang and A.-J. Wang, *Small*, **n/a**, 2300136.

28. Y. Wang, Y. Liu, L. Zhou, P. Zhang, X. Wu, T. Liu, S. Mehdi, X. Guo, J. Jiang and B. Li, *Journal of Materials Chemistry A*, 2023, **11**, 1894-1905.
29. X. Yan, Y. Tu, H. Yuan, Y. Xia, Y. Jiang, S. Zhu, C. Li, H. Tang, P. Du and M. Lei, *Advanced Composites and Hybrid Materials*, 2023, **6**, 71.
30. Q. Cao, L. Wan, Z. Xu, W. Kuang, H. Liu, X. Zhang, W. Zhang, Y. Lu, Y. Yao, B. Wang and K. Liu, *Advanced Materials*, **n/a**, 2210550.
31. J. Kuang, Y. Shen, Y. Zhang, J. Yao, J. Du, S. Yang, S. Zhang, Y. Fang and X. Cai, *Small*, **n/a**, 2207413.
32. C. Hu, Q. Liang, Y. Yang, Q. Peng, Z. Luo, J. Dong, T. T. Isimjan and X. Yang, *Journal of Colloid and Interface Science*, 2023, **633**, 500-510.
33. R. Liu, Y. Wang, W. Zheng, H. Zhang and Z. Zhang, *Energ Fuel*, 2023, **37**, 1344-1352.
